# Supplementary material for: Entry receptor LDLRAD3 is required for Venezuelan equine encephalitis virus peripheral infection and neurotropism leading to pathogenesis in mice
Source: PubMed Central journal article supplement — Cell Rep. Author manuscript; Available in PMC 2023 Sep 27. (PMC10529316; doi:10.1016/j.celrep.2023.112946), 2023-08-08
Supplement: NIHMS1928319-supplement-1.pdf [file NIHMS1928319-supplement-1.pdf]

**Cell Reports, Volume 42**

**Supplemental information**

**Entry receptor LDLRAD3 is required for Venezuelan  
equine encephalitis virus peripheral infection  
and neurotropism leading to pathogenesis in mice**

**Natasha M. Kafai, Hana Janova, Matthew D. Cain, Yael Alippe, Stefanie Muraro, Alan Sariol, Michelle Elam-Noll, Robyn S. Klein, and Michael S. Diamond**

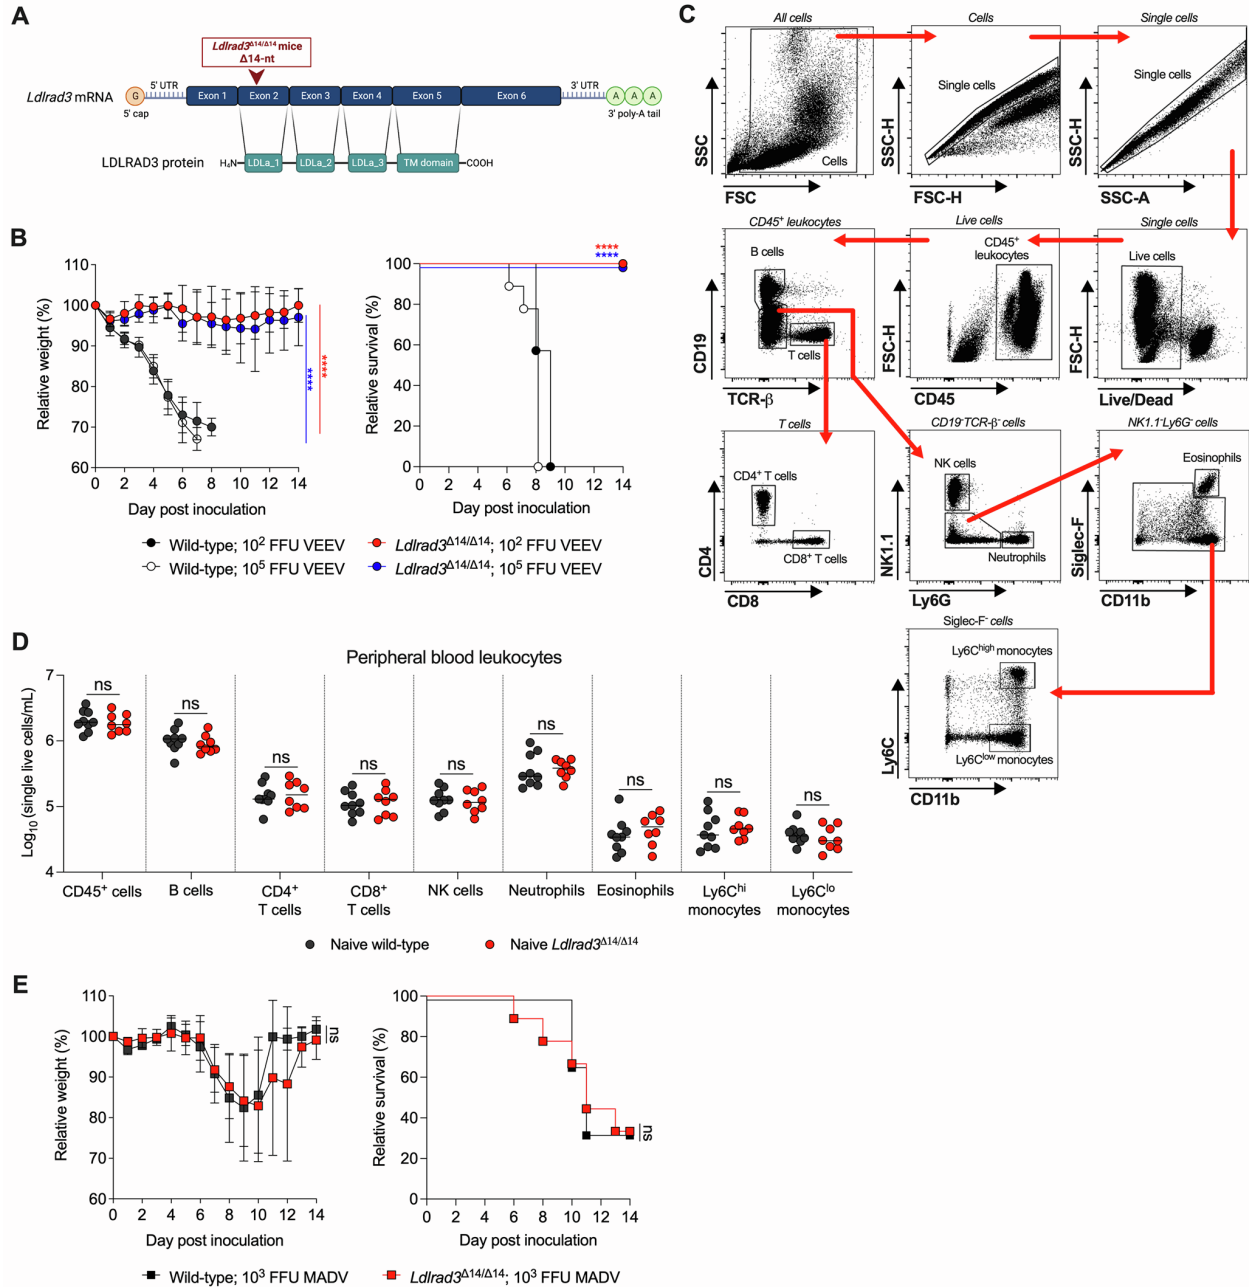

**Figure S1. *Ldlrad3*-deficient mice survive high-dose VEEV challenge but succumb to MADV infection, related to Figure 1. (A)** Cartoon schematic of *Ldlrad3* mRNA generated using BioRender. *Ldlrad3* mRNA and corresponding LDLRAD3 proteins with 14-nucleotide frameshift deletion site in exon 2 indicated with a red arrow. **(B)** Seven to 11-week-old male or female wild-type or *Ldlrad3*<sup>Δ14/Δ14</sup> mice were inoculated subcutaneously in the footpad with 10<sup>2</sup> FFU (wild-type, n = 14; *Ldlrad3*<sup>Δ14/Δ14</sup>, n = 12) or 10<sup>5</sup> FFU (wild-type, n = 9; *Ldlrad3*<sup>Δ14/Δ14</sup>, n = 8) of VEEV ZPC738 and monitored daily for weight change (symbols represent mean ± SD) and survival. Red and blue stars indicate a statistically significant difference in weight loss or survival between wild-type and *Ldlrad3*<sup>Δ14/Δ14</sup> mice inoculated with 10<sup>2</sup> FFU or 10<sup>5</sup> FFU, respectively. Data are from two

independent experiments. **(C)** Representative flow cytometry gating scheme of leukocytes isolated from peripheral blood of a naïve, wild-type C57BL6/J mouse and stained with immune cell markers. **(D)** Analysis of leukocyte cell subsets in the peripheral blood of naïve wild-type C57BL6/J (n = 9) and *Ldlrad3*<sup>Δ14/Δ14</sup> (n = 8) mice using flow cytometry. Cells counts are normalized to volume of blood. Data are from two independent experiments. **(E)** Six to seven-week-old male or female wild-type or *Ldlrad3*<sup>Δ14/Δ14</sup> mice (n = 9) were inoculated subcutaneously in the footpad with 10<sup>3</sup> FFU of MADV, a South American lineage of EEEV, and monitored daily for weight change (symbols represent mean ± SD) and survival. Data are from two independent experiments. For weight changes, area under the curve analysis was performed (unpaired t-test). To avoid survivor bias in weight curves, statistical significance was calculated at timepoints when all mice were alive **(B and E, left)**. Survival data were analyzed by log-rank test **(B and E, right)**, and flow cytometry data were analyzed by Mann-Whitney test (ns, not significant; \*\*\*\**P* < 0.0001).

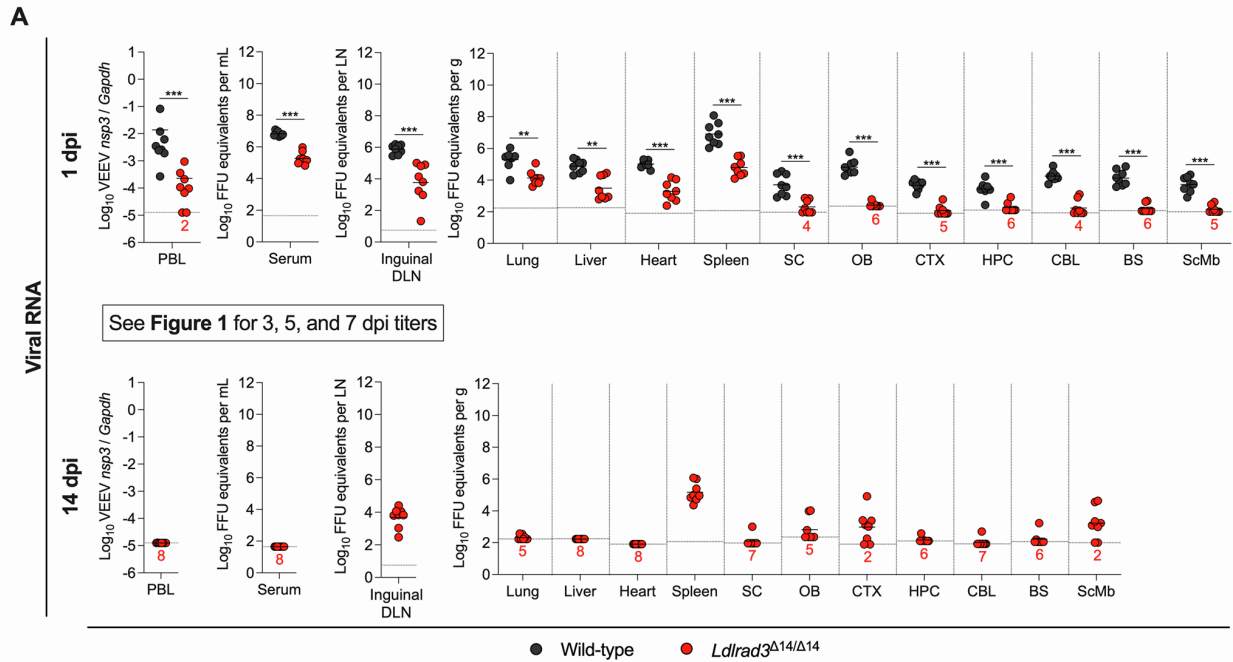

**B** Wild-type cerebral cortex: subcutaneous inoculation with  $10^2$  FFU of VEEV at 5 dpi

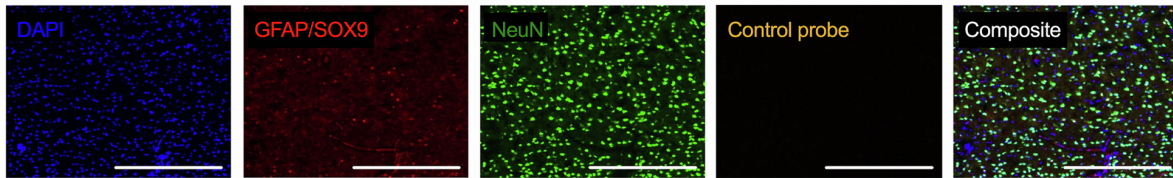

Wild-type cerebral cortex: mock subcutaneous inoculation

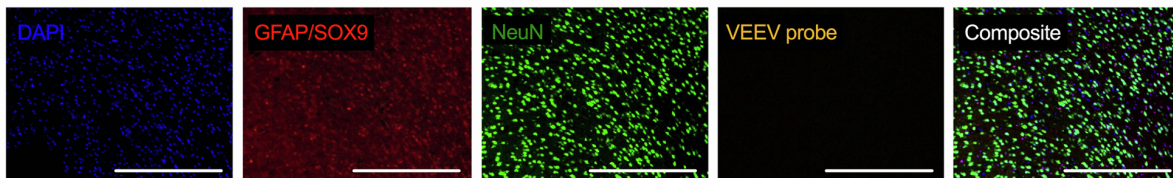

**C** Wild-type cerebral cortex: subcutaneous inoculation with  $10^2$  FFU of VEEV at 5 dpi

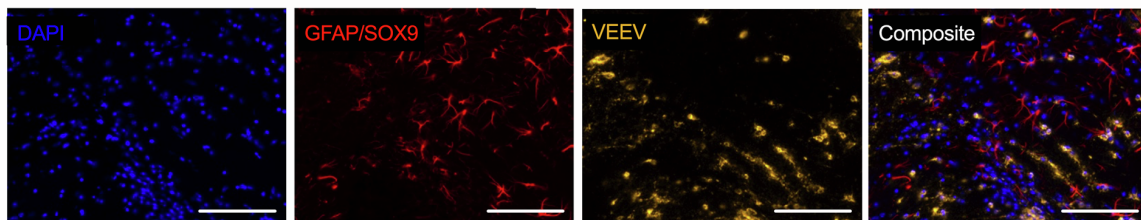

**Figure S2. Viral RNA after subcutaneous inoculation at 1 and 14 dpi and FISH staining controls at 5 dpi, related to Figure 2. (A)** Wild-type ( $n = 7-9$ ) or *Ldlrad3*<sup>Δ14/Δ14</sup> ( $n = 7-12$ ) mice were inoculated subcutaneously with  $10^2$  FFU of VEEV ZPC738. At 1 (for wild-type and *Ldlrad3*<sup>Δ14/Δ14</sup> mice) and 14 dpi (*Ldlrad3*<sup>Δ14/Δ14</sup> mice only), indicated tissues and samples were

assessed for viral RNA by described in **Fig 1** (peripheral blood leukocytes [PBL]); draining lymph node [DLN]; spinal cord [SC]; olfactory bulb [OB]; cerebral cortex [CTX]; hippocampus [HPC]; cerebellum [CBL]; brainstem [BS]; subcortical/midbrain regions [ScMb]). Mean values are shown. The LOD for each tissue is indicated by a dashed line, and numbers in black or red enumerate samples with titers at the LOD. Data are from two or three independent experiments per timepoint and analyzed by Mann-Whitney test (\*\* $P < 0.01$  and \*\*\* $P < 0.001$ ). **(B)** FISH staining controls for VEEV RNA visualization. Images of the cerebral cortex from a wild-type mouse five days after subcutaneous inoculation with  $10^2$  FFU of VEEV ZPC738 and stained by FISH with a negative control probe, IHC for cell-specific antigen, and DAPI counterstaining for nuclei visualization (**top panels**). Images of the cerebral cortex from a mock-inoculated mouse stained by FISH with the VEEV-specific probe, IHC for cell-specific antigen, and DAPI counterstaining for nuclei visualization (**bottom panels**) (scale bar: 250  $\mu\text{m}$ ). **(C)** Image from the cerebral cortex of a VEEV-infected wild-type mouse at 5 dpi from **Fig 2C** highlighting lack of co-localization between GFAP/SOX9<sup>+</sup> and VEEV<sup>+</sup> cells (scale bar: 250  $\mu\text{m}$ ).

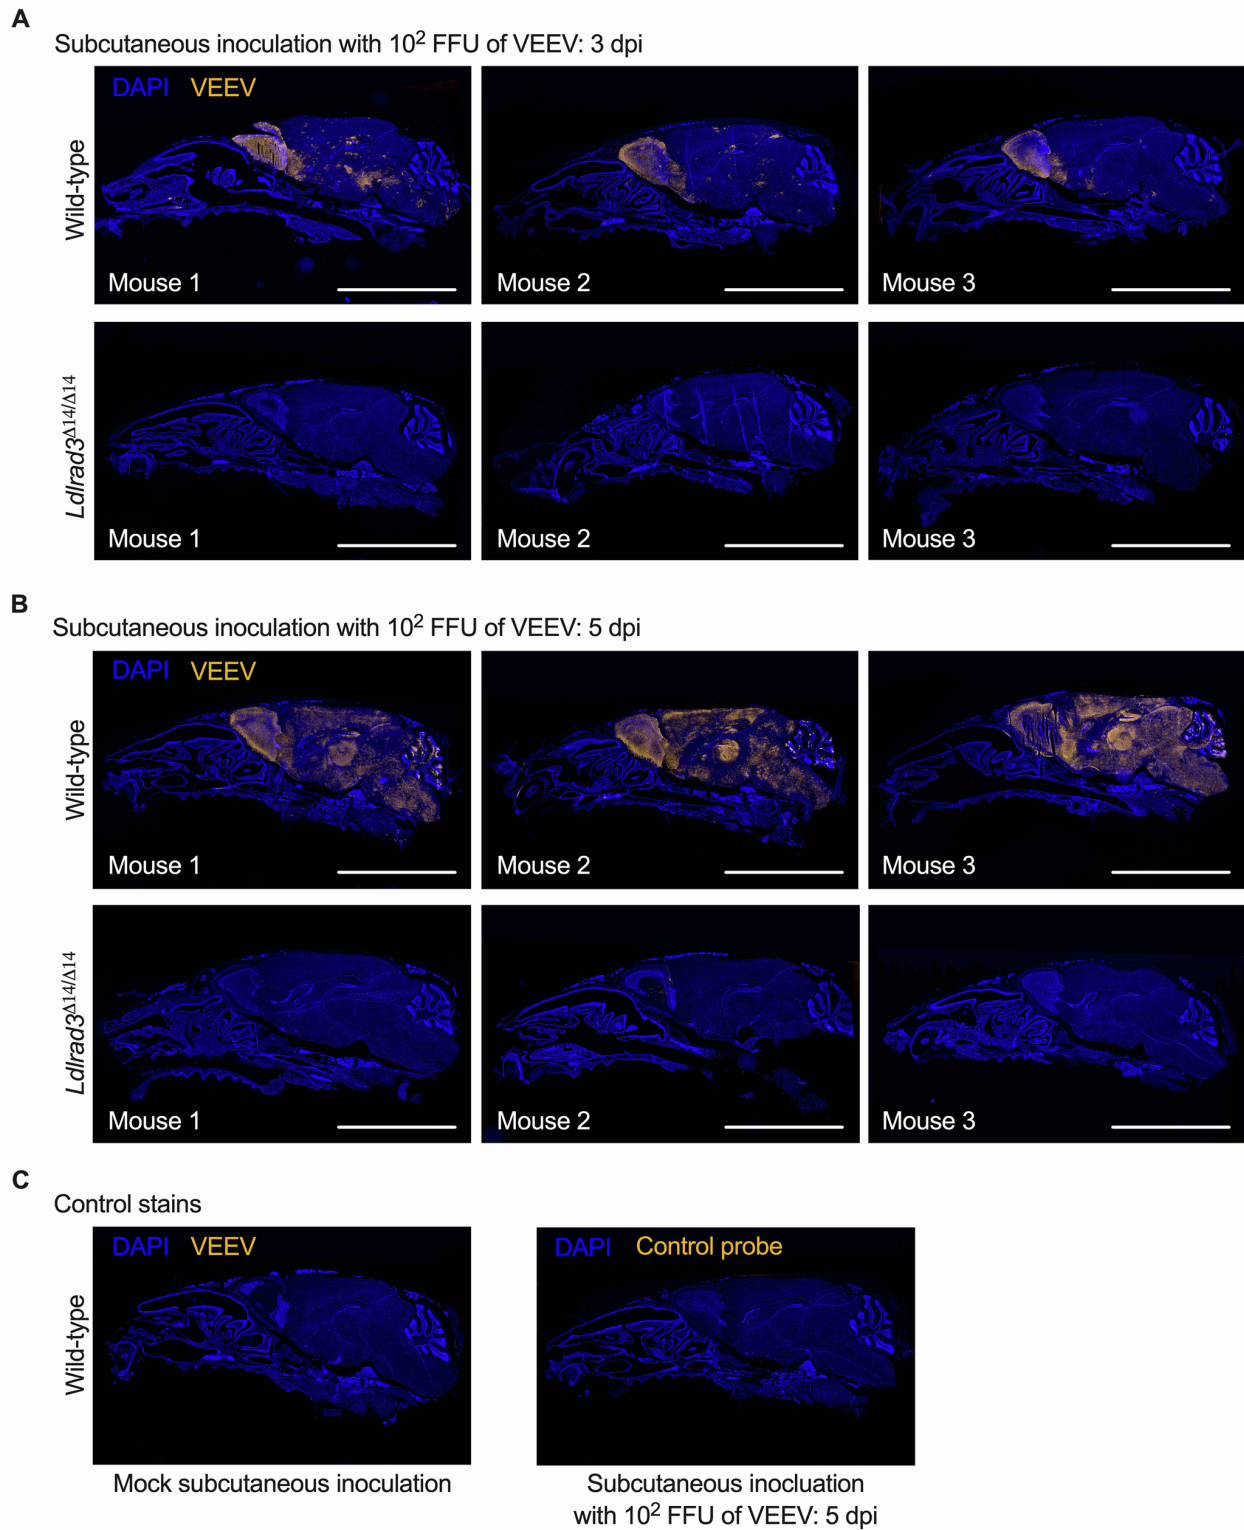

**Figure S3. Fluorescence *in situ* hybridization (FISH) of VEEV RNA in wild-type and *Ldlrad3*<sup>Δ14/Δ14</sup> brains at 3 and 5 dpi after subcutaneous inoculation, related to Figure 2. Images of sagittal skull and brain sections from different wild-type or *Ldlrad3*<sup>Δ14/Δ14</sup> mice at 3 (A;**

n = 4) or 5 (**B**; n = 4) days after subcutaneous inoculation with  $10^2$  FFU of VEEV ZPC738 and FISH staining for VEEV RNA and DAPI counterstaining for nuclei visualization. Data are from two experiments. (**C**) FISH staining negative controls for VEEV RNA visualization. Sagittal sections of a wild-type mouse brain 5 days after subcutaneous inoculation with PBS (mock) or  $10^2$  FFU of VEEV ZPC738 and staining by FISH with a VEEV-specific probe or negative control probe, respectively, before counterstaining with DAPI for nuclei visualization. Scale bars: 5 mm.

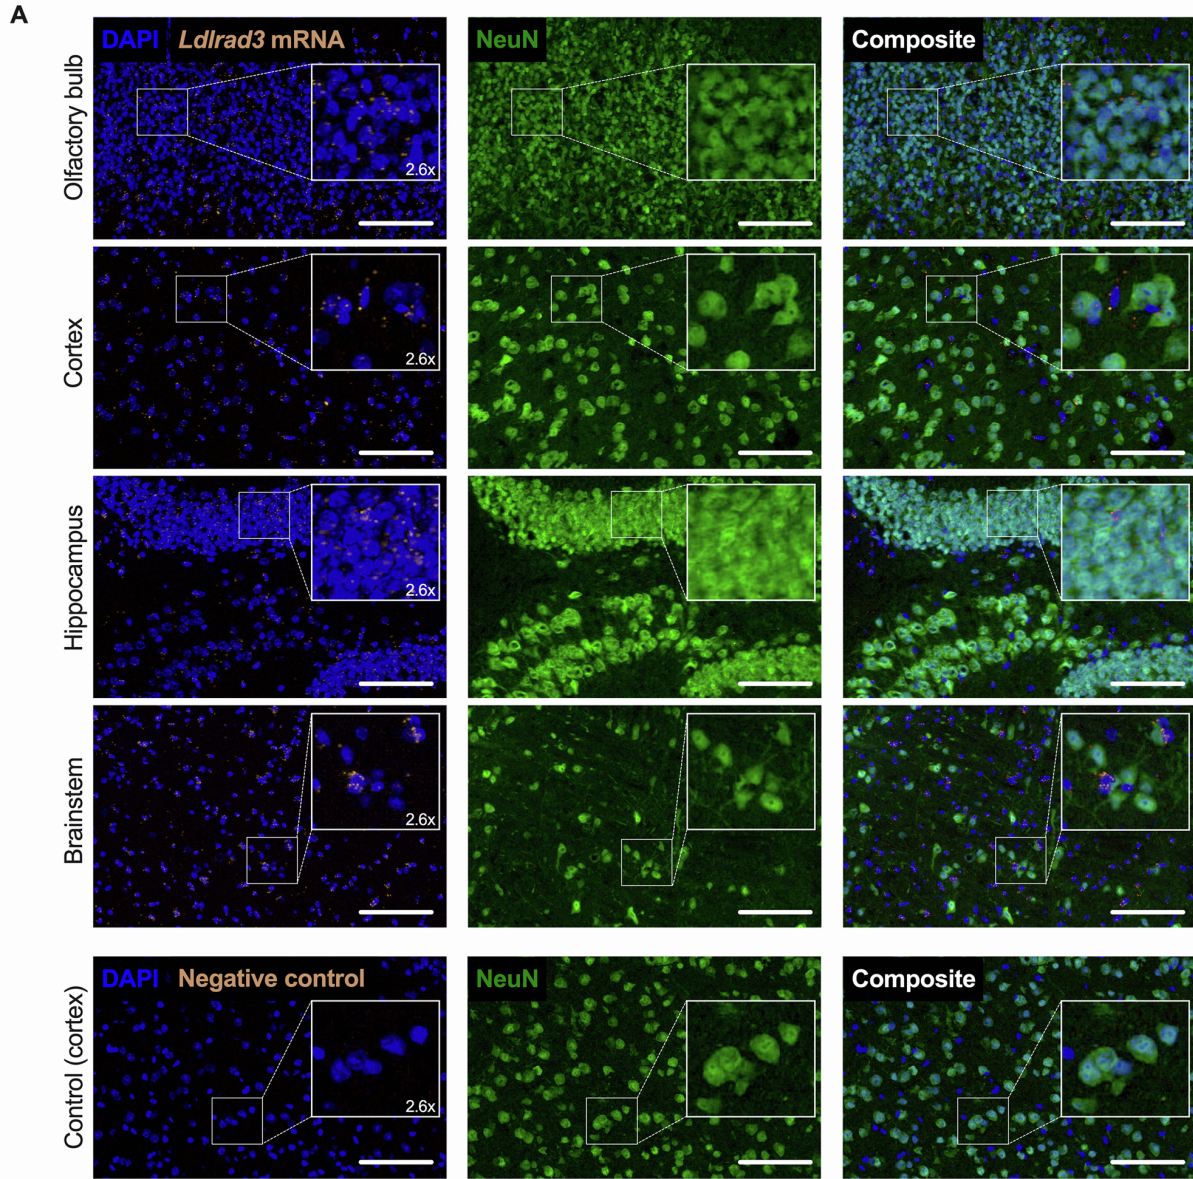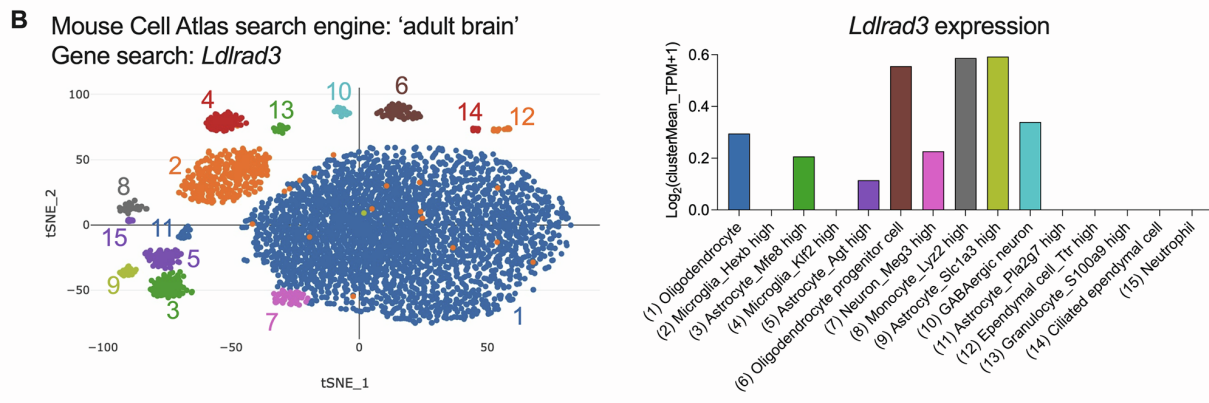

**Figure S4. *Ldlrad3* mRNA expression in wild-type mouse brains, related to Figure 4 (A)**  
Representative images from sagittal brain sections of a wild-type C57BL/6J mouse brain (scale



bars: 100  $\mu\text{m}$ ) stained with a combination of FISH probe for *Ldlrad3* RNA, or negative control probe, immunohistochemical staining of NeuN<sup>+</sup> neurons, and DAPI counterstaining for nuclei visualization. Data are representative of two experiments (n = 3). **(B)** Mouse Cell Atlas Database search results for cell type clusters in the adult mouse brain represented as t-distributed Stochastic Neighbor Embedding (t-SNE) plots (*left*) and corresponding differential expression of *Ldlrad3* RNA in each cell cluster (*right*).

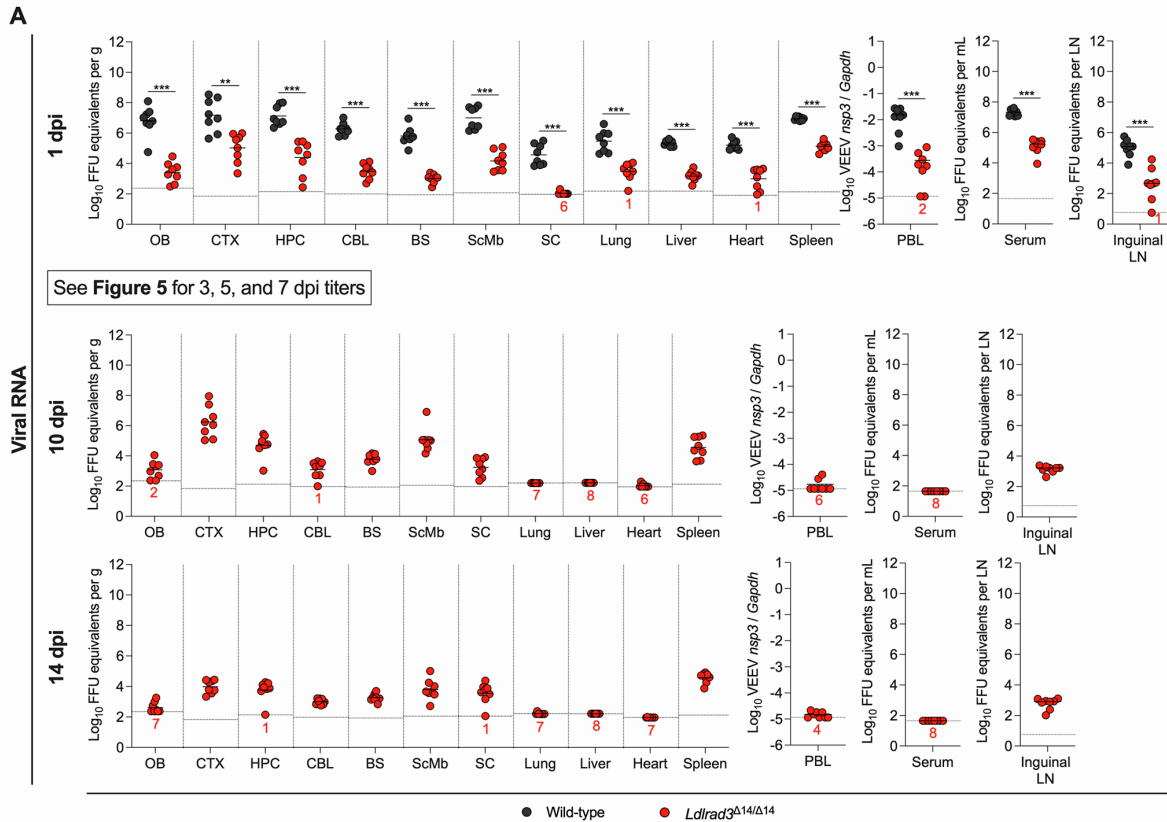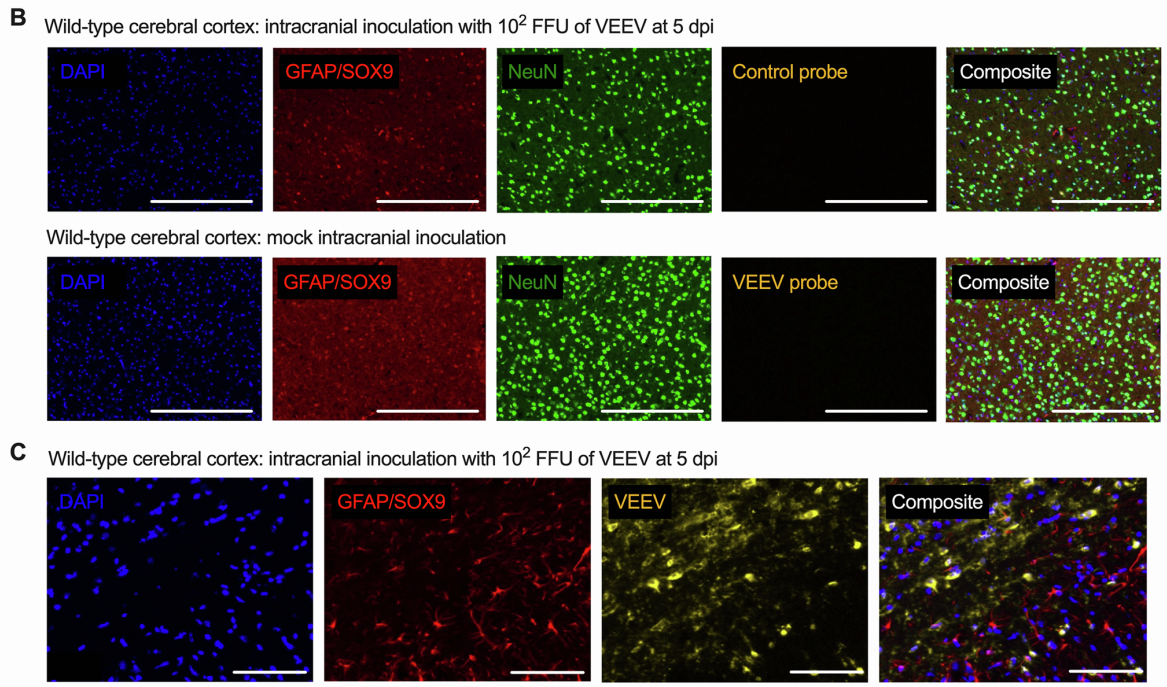

**Figure S5. Viral RNA after intracranial inoculation at 1, 10, and 14 dpi and FISH staining controls at 5 dpi, related to Figure 5. (A)** Wild-type or *Ldlrad3*<sup>Δ14/Δ14</sup> (n = 8) mice were inoculated intracranially with  $10^2$  FFU of VEEV ZPC738. At 1 (for wild-type and *Ldlrad3*<sup>Δ14/Δ14</sup> mice) and 10

and 14 dpi (*Ldlrad3*<sup>Δ14/Δ14</sup> mice only), indicated tissues and samples were assessed for viral RNA as described in **Fig 1** (olfactory bulb [OB]; cerebral cortex [CTX]; hippocampus [HPC]; cerebellum [CBL]; brainstem [BS]; subcortical/midbrain regions [ScMb]; spinal cord [SC]; peripheral blood leukocytes [PBL]; lymph node [LN]). Mean values are shown. The LOD for each tissue is indicated by a dashed line, and numbers in black or red enumerate samples with titers at the LOD. Data are from two or three independent experiments per timepoint and analyzed by Mann-Whitney test (\*\**P* < 0.01 and \*\*\**P* < 0.001). **(B)** FISH staining controls for VEEV RNA visualization. Images of the cerebral cortex from a wild-type mouse five days after intracranial inoculation with 10<sup>2</sup> FFU of VEEV ZPC738 and stained by FISH with a negative control probe, IHC for cell-specific antigen, and DAPI counterstaining for nuclei visualization (**top panels**). Images of the cerebral cortex from a mock intracranially-inoculated mouse stained by FISH with the VEEV-specific probe, IHC for cell-specific antigen, and DAPI counterstaining for nuclei visualization (**bottom panels**) (scale bar: 250 μm). **(C)** Image from VEEV-infected wild-type mouse cerebral cortex at 5 dpi from **Fig 2C** highlighting lack of co-localization between GFAP/SOX9<sup>+</sup> and VEEV<sup>+</sup> cells (scale bar: 250 μm).

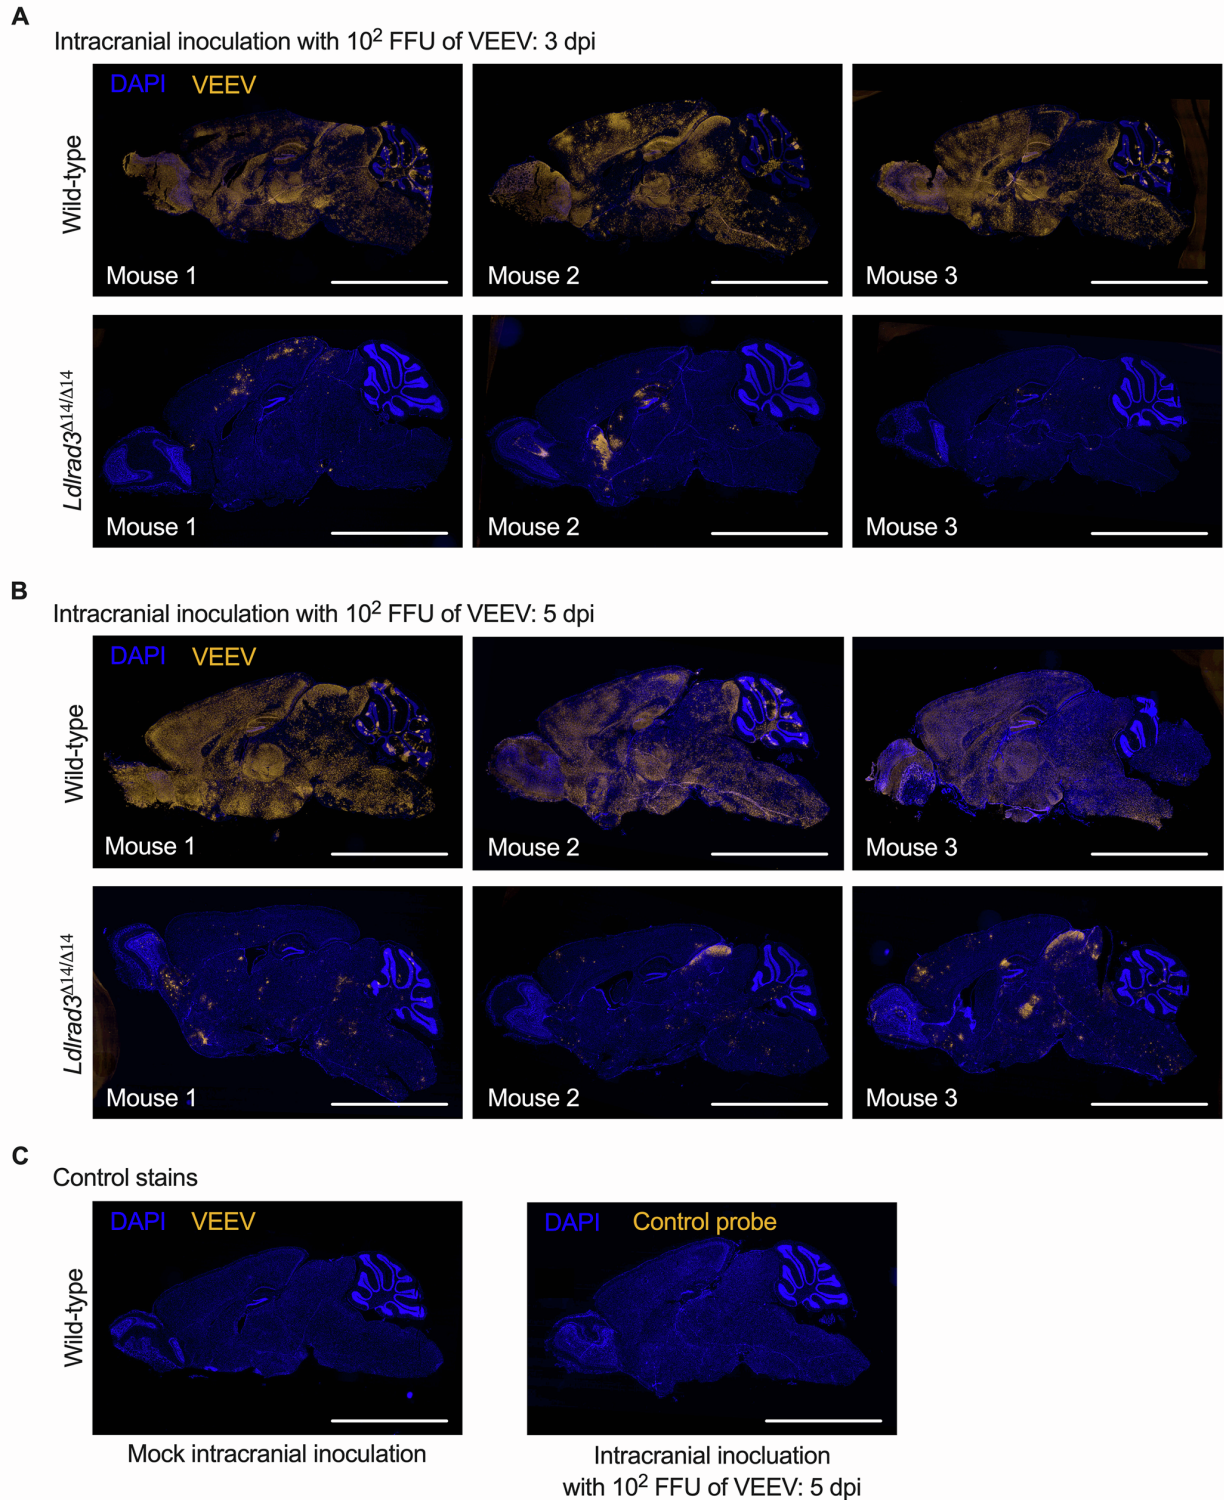

**Figure S6. Fluorescence *in situ* hybridization (FISH) of VEEV RNA in wild-type and *Ldlrad3*<sup>Δ14/Δ14</sup> brains at 3 and 5 dpi after intracranial inoculation, related to Figure 5. Images of sagittal skull and brain sections from different wild-type or *Ldlrad3*<sup>Δ14/Δ14</sup> mice 3 (A; n = 4) or 5**

(**B**; n = 4) days after intracranial inoculation with  $10^2$  FFU of VEEV ZPC738 and FISH staining for VEEV RNA and DAPI counterstaining for nuclei visualization. Data are from two experiments. (**C**) FISH staining controls for VEEV RNA visualization. Sagittal sections of a wild-type mouse brain 5 days after intracranial inoculation with PBS (mock) or  $10^2$  FFU of VEEV ZPC738 and staining by FISH with a VEEV-specific probe or negative control probe, respectively, before counterstaining with DAPI for nuclei visualization. Scale bars: 5 mm.

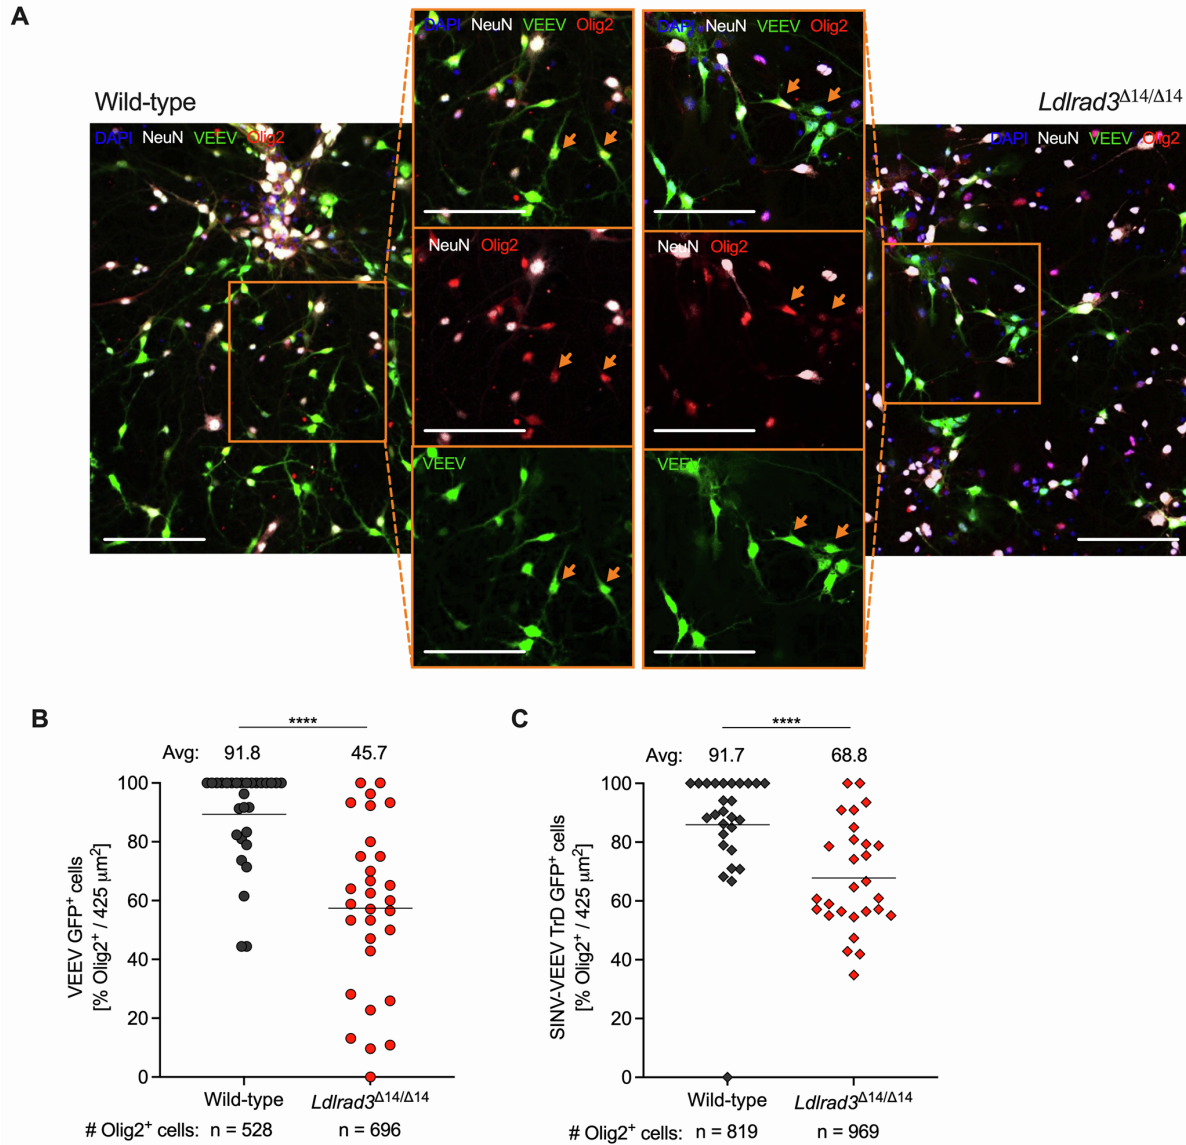

**Figure S7. VEEV infection of Olig2<sup>+</sup> cells in LDLRAD3-deficient mixed neuron-glia primary culture, related to Figure 6. (A-C)** Immunofluorescence analysis of VEEV-EGFP- or SINV-VEEV TrD-GFP-infected NeuN<sup>+</sup> neurons in mixed neuron-glia cultures isolated from E17 embryos of wild-type and *Ldlrad3*<sup>Δ14/Δ14</sup> mice and infected 11 to 14 days after plating at a MOI 20 for 7 h. **(A)** Representative confocal microscopy images of mixed neuron-glia cultures derived from wild-type (left panels) or *Ldlrad3*<sup>Δ14/Δ14</sup> (right panels) mice highlighting nuclei (DAPI<sup>+</sup>), neurons (NeuN<sup>+</sup>), oligodendrocyte progenitor cells (Olig2<sup>+</sup>), and VEEV infection (GFP<sup>+</sup>). Orange boxes indicate enlarged insets, and orange arrows indicate examples of infected oligodendrocyte lineage cells (Olig2<sup>+</sup>GFP<sup>+</sup> co-localization) (low magnification, scale bars: 100 μm and high magnification, scale bars: 270 μm). Quantification of VEEV-infected Olig2<sup>+</sup> cells is represented per image area (425 μm<sup>2</sup>) as the percentage of Olig2<sup>+</sup> cells that are GFP<sup>+</sup> for cultures infected with **(B)** VEEV ZPC738-EGFP or **(C)** SINV-VEEV TrD-GFP. The mean percentage of infected oligodendrocyte lineage cells is indicated above each data set, and total number of Olig2<sup>+</sup> cells counted is indicated below.

Data are from two independent experiments each with two technical replicates and analyzed by Mann-Whitney test (\*\*\*\* $P < 0.0001$ ).
